# Supplementary material
Source: PubMed Central journal article supplement (PMC6556715)

**Evolution over time of hydration status and PD related practice patterns in an incident peritoneal dialysis patient cohort**

Wim Van Biesen, Christian Verger, James Heaf, François Vrtovsnik, Zita Leme Britto, Jun-Young Do, Mario Prieto Velasco, Juan Pérez Martínez<sup>8</sup>, Carlo Crepaldi, Tatiana De los Ríos, Adelheid Gauly, Katharina Ihle, Claudio Ronco for the IPOD-PD Study Group

**Supplemental Table 1:** Inclusion and exclusion criteria

**Supplemental Table 2:** Documented parameters by visit

**Supplemental Figure 1:** Flow diagram of the analysis population

**Supplemental Figure 2:** Course of systolic (A) and diastolic (B) blood pressure.

**Supplemental Figure 3:** Course of GFR during the study

**Supplemental Figure 4:** Course of 24-hr urine output during the study

**Supplemental Table 3: Inclusion and exclusion criteria**

|                           |                                                                                                                                                                                                                                                                                                                                                                                                                                                                                    |
|---------------------------|------------------------------------------------------------------------------------------------------------------------------------------------------------------------------------------------------------------------------------------------------------------------------------------------------------------------------------------------------------------------------------------------------------------------------------------------------------------------------------|
| <b>Inclusion criteria</b> | <ul style="list-style-type: none"><li>- CKD patients with indication for renal replacement therapy</li><li>- Incident patients who chose peritoneal dialysis, directly before the start of first peritoneal dialysis</li><li>- Patients in whom routine measurement of BCM is possible</li><li>- Patients with at least 18 years of age</li><li>- Written informed consent to study participation and data submission</li></ul>                                                    |
| <b>Exclusion criteria</b> | <ul style="list-style-type: none"><li>- Patients treated with HD before start of PD</li><li>- Patients who have any condition which prohibit the use of BCM: implanted electronic medical device (e.g. a pacemaker) or connected to an external electronic medical device</li><li>- Any kind of metal implants or metal artificial joints (Dental implants or piercings are allowed)</li><li>- Patients with major amputations (e.g. lower leg)</li><li>- Pregnant women</li></ul> |

**Supplemental Table 4: Documented parameters by visit**

| Baseline visit                                                                                                                                                                   | Follow-up visits                                                                                                                                                                                                                                   | Termination                                                                                                                                                                                               |
|----------------------------------------------------------------------------------------------------------------------------------------------------------------------------------|----------------------------------------------------------------------------------------------------------------------------------------------------------------------------------------------------------------------------------------------------|-----------------------------------------------------------------------------------------------------------------------------------------------------------------------------------------------------------|
| <u>Inclusion and exclusion criteria at patient inclusion</u>                                                                                                                     |                                                                                                                                                                                                                                                    |                                                                                                                                                                                                           |
| <u>Date of visit</u>                                                                                                                                                             | <u>Date of visit</u>                                                                                                                                                                                                                               | <u>Date of study termination</u>                                                                                                                                                                          |
| <u>Baseline data</u><br>- Demography<br>- Anamnesis                                                                                                                              |                                                                                                                                                                                                                                                    |                                                                                                                                                                                                           |
| <u>Laboratory</u><br>- Haemoglobin<br>- Haematocrit<br>- Albumin<br>- CRP<br>- Glucose<br>- HbA1c<br>- Urea/BUN<br>- Serum creatinine                                            | <u>Laboratory</u><br>- Haemoglobin<br>- Haematocrit<br>- Albumin<br>- CRP<br>- Glucose<br>- HbA1c<br>- Urea/BUN<br>- Serum creatinine                                                                                                              |                                                                                                                                                                                                           |
| <u>Patient status</u><br>- Office blood pressure<br>- Residual renal function                                                                                                    | <u>Patient status</u><br>- Office blood pressure<br>- Residual renal function:<br>- Weekly peritoneal Kt/V<br>- Peritoneal membrane transport status, assessed according to test routinely performed in the centre<br>- Mean daily ultrafiltration |                                                                                                                                                                                                           |
| <u>Hydration status</u><br>- 5-step score according to medical judgement<br>- Body composition data (BCM)<br>- Estimated body weight at euvolaemia                               | <u>Hydration status</u><br>- 5-step score according to medical judgement<br>- Body composition data (BCM)<br>- Estimated body weight at euvolaemia                                                                                                 | <u>Hydration status</u> , if possible at the moment of cessation of PD therapy<br>- 5-step score according to medical judgement<br>- Body composition data (BCM)<br>- Estimated body weight at euvolaemia |
| <u>PD prescription at start of dialysis</u><br>- PD modality: CAPD or APD<br>- Number of exchanges<br>- Dwell duration<br>- Buffer<br>- Osmotic agent<br>- Glucose concentration | <u>Changes in PD prescription</u><br>- PD modality: CAPD or APD<br>- Number of exchanges<br>- Dwell duration<br>- Buffer<br>- Osmotic agent<br>- Glucose concentration<br>- Reason for prescription change                                         |                                                                                                                                                                                                           |
| <u>Medications</u><br>- Diuretics dose<br>- Classes of different antihypertensive drugs<br>- Insulin                                                                             | <u>Changes in medications</u><br>- Diuretics dose<br>- Classes of different antihypertensive drugs<br>- Insulin                                                                                                                                    |                                                                                                                                                                                                           |
|                                                                                                                                                                                  |                                                                                                                                                                                                                                                    | <u>Reason of study termination:</u><br>- Change to HD<br>- Transplantation<br>- Change of centre<br>- Death<br>- Patient wish<br>- Investigator wish                                                      |
| <u>Comments regarding the current visit</u>                                                                                                                                      | <u>Comments regarding the current visit</u>                                                                                                                                                                                                        |                                                                                                                                                                                                           |

**Supplemental Figure 1: Flow diagram of the analysis population**

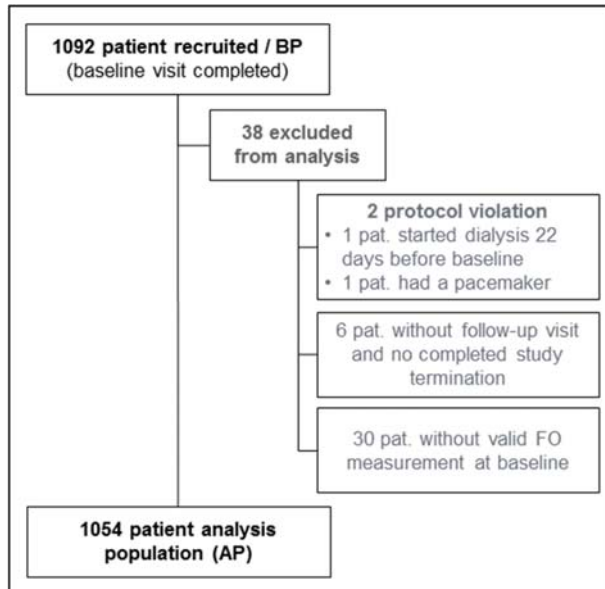

**Supplemental Figure 2:** Course of systolic (A) and diastolic (B) blood pressure.

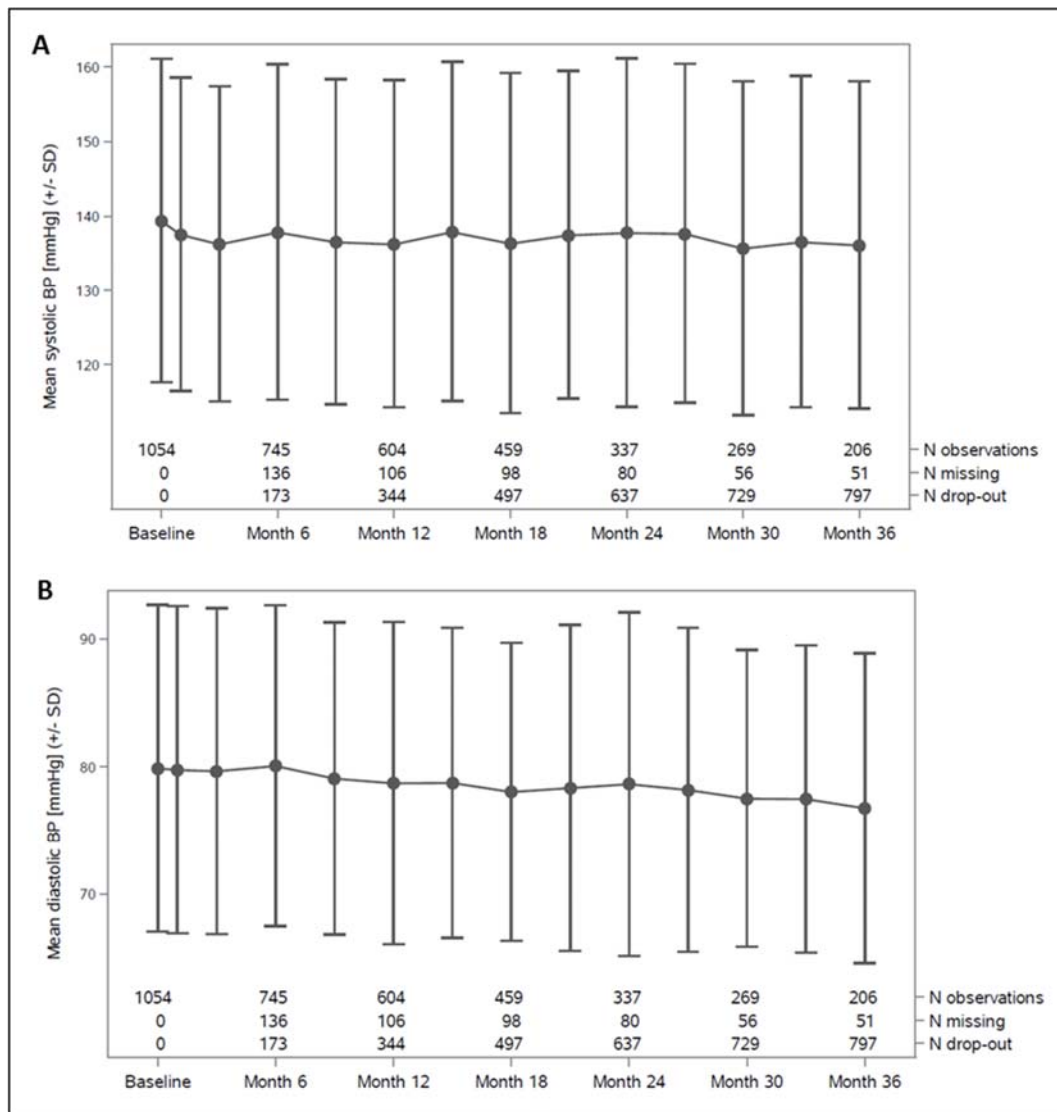

**Supplemental Figure 3: Course of GFR during the study**

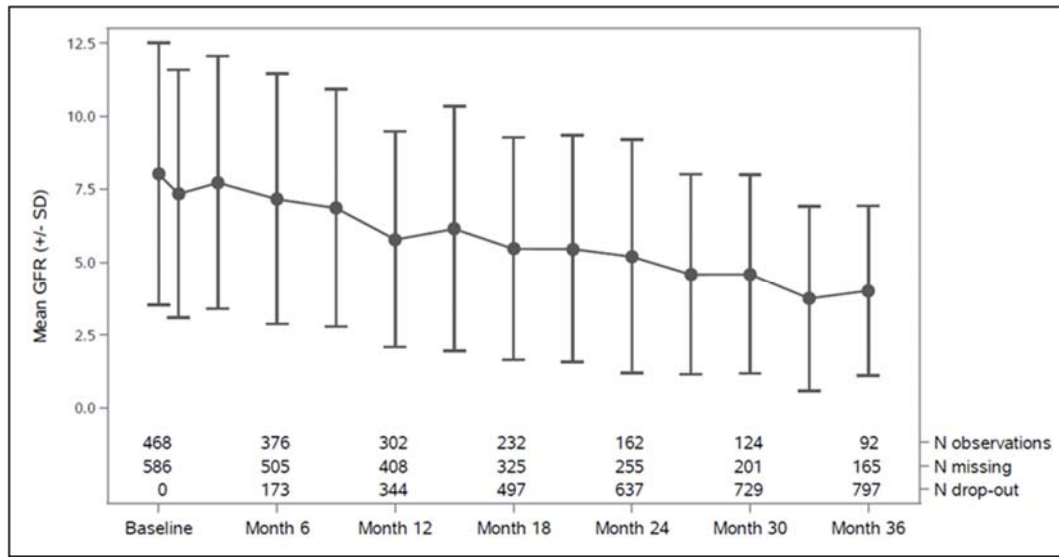

**Supplemental Figure 4: Course of 24-hr urine output during the study**

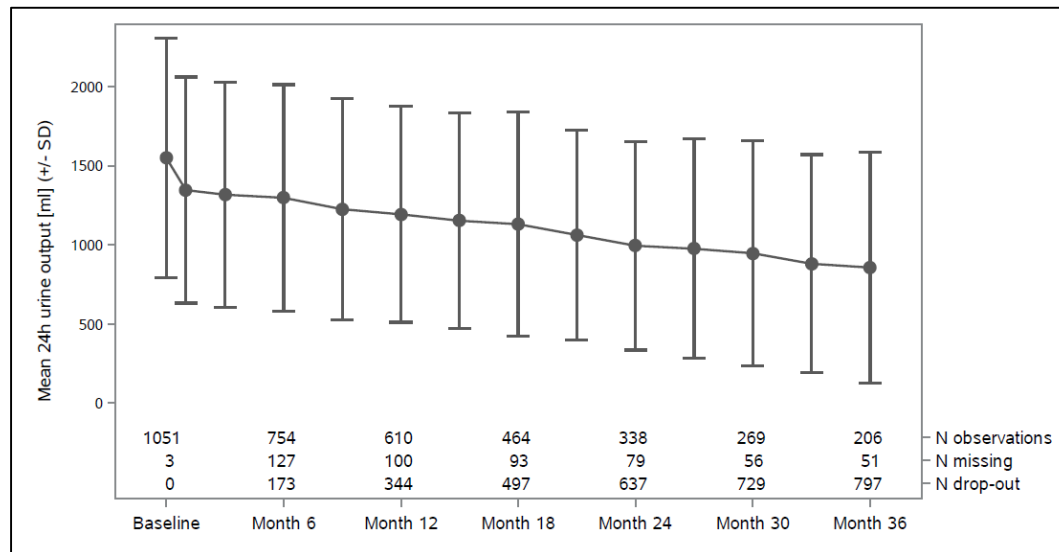

Supplement: CJN.11590918SupplementaryData.pdf [file CJN.11590918SupplementaryData.pdf]
